# Supplementary material for: Discovery of a magnetic conductive interface in PbZr0.2Ti0.8O3 /SrTiO3 heterostructures
Source: PubMed Central journal article supplement (PMC5814552; doi:10.1038/s41467-018-02914-9), 2018-02-15
Supplement: 41467_2018_2914_MOESM2_ESM.pdf [file 41467_2018_2914_MOESM2_ESM.pdf]

## Description of Additional Supplementary Files

File Name: Supplementary Movie 1

Description: **Domain switching behaviors in PZT/SRO/DSO.** Domain evolution under linear 0→9 V observed by *in-situ* TEM. The time duration of the applied voltage is 3 s. The applied voltage starts at the beginning of the video.

File Name: Supplementary Movie 2

Description: **Domain switching behaviors in STO/PZT/SRO/DSO.** Domain evolution under linear 0→−6 V observed by *in-situ* TEM. The time duration of the applied voltage is 20 s. The applied voltage starts at the beginning of the video.
